# Supplementary material
Source: publisher site journal article supplement (https://www.dovepress.com/article/153000)
Supplement: Supplementary file 1 [file get_supplementary_file.php]

Supplementary materials

Table S1. ICD-9 codes for antidepressant treatment indications

| Treatment Indication            | ICD-9 code         | Code description                                                                  |
|---------------------------------|--------------------|-----------------------------------------------------------------------------------|
| Depressive disorders            | 296.2              | Major depressive disorder, single episode                                         |
|                                 | 296.3              | Major depressive disorder, recurrent episode                                      |
|                                 | 296.9              | Other and unspecified episodic mood disorder                                      |
|                                 | 300.4              | Dysthymic disorder                                                                |
|                                 | 301.1              | Affective personality disorder (includes chronic depressive personality disorder) |
|                                 | 309.0              | Adjustment disorder with depressed mood                                           |
|                                 | 309.1              | Prolonged depressive reaction                                                     |
|                                 | 311.x              | Depressive disorder, not elsewhere classified                                     |
| Anxiety/stress disorders        | 300.0              | Anxiety states                                                                    |
|                                 | 300.2              | Phobic disorders                                                                  |
|                                 | 308.x              | Acute reaction to stress                                                          |
|                                 | 309.2              | Adjustment reaction with predominant disturbance of other emotions                |
|                                 | 309.8              | Other specified adjustment reactions (includes posttraumatic stress disorder)     |
| Sleeping disorders              | 307.4              | Specific disorders of sleep of nonorganic origin                                  |
|                                 | 780.5              | Sleep disturbances                                                                |
| Pain                            | 053.1              | Herpes zoster with other nervous system complications                             |
|                                 | 250.6              | Diabetes with neurological manifestations                                         |
|                                 | 307.8              | Pain disorders related to psychological factors                                   |
|                                 | 337.2              | Reflex sympathetic dystrophy                                                      |
|                                 | 338.x              | Pain, not elsewhere classified                                                    |
|                                 | 350.1              | Trigeminal neuralgia                                                              |
|                                 | 350.2              | Atypical face pain                                                                |
|                                 | 352.1              | Glossopharyngeal neuralgia                                                        |
|                                 | 353.X              | Nerve root and plexus disorders                                                   |
|                                 | 354.x              | Mononeuritis of upper limb and mononeuritis multiplex                             |
|                                 | 355.x              | Mononeuritis of lower limb                                                        |
|                                 | 357.2              | Polyneuropathy in diabetes                                                        |
|                                 | 714.x              | Rheumatoid arthritis and other inflammatory polyarthropathies                     |
|                                 | 715.x              | Osteoarthritis and allied disorders                                               |
|                                 | 719.4              | Pain in joint                                                                     |
|                                 | 721.x              | Spondylosis and allied disorders                                                  |
|                                 | 722.x              | Intervertebral disc disorders                                                     |
|                                 | 723.x              | Other disorders of cervical region                                                |
|                                 | 724.x              | Other and unspecified disorders of back                                           |
|                                 | 729.2              | Neuralgia, neuritis, and radiculitis, unspecified                                 |
|                                 | 729.5              | Pain in limb                                                                      |
| 737.x                           | Curvature of spine |                                                                                   |
| 786.5                           | Chest pain         |                                                                                   |
| 789.0                           | Abdominal pain     |                                                                                   |
| Migraine                        | 346.x              | Migraine                                                                          |
|                                 | 784.0              | Headache                                                                          |
| Fibromyalgia                    | 729.1              | Myalgia and myositis, unspecified                                                 |
| Obsessive-compulsive disorder   | 300.3              | Obsessive-compulsive disorder                                                     |
| Vasomotor symptoms of menopause | 627.2              | Symptomatic menopausal or female climacteric states                               |

|                                          |                   |                                           |
|------------------------------------------|-------------------|-------------------------------------------|
| Nicotine dependence                      | 305.1             | Tobacco use disorder                      |
| <b>Treatment Indication</b>              | <b>ICD-9 code</b> | <b>Code description</b>                   |
| Attention deficit/hyperactivity disorder | 314.x             | Hyperkinetic syndrome of childhood        |
| Sexual dysfunction                       | 302.7             | Psychosexual dysfunction                  |
|                                          | 607.8             | Other specified disorders of penis        |
| Pre-menstrual dysphoric disorder         | 625.4             | Premenstrual tension syndromes            |
| Eating disorders                         | 307.1             | Anorexia nervosa                          |
|                                          | 307.5             | Other and unspecified disorders of eating |
|                                          | 783.0             | Anorexia                                  |
|                                          | 783.3             | Feeding difficulties and mismanagement    |

**Table S2 Top 15 four-digit ICD-9 codes recorded for patients in physician billings or hospital discharge summary data over the past year for MOXXI patients who were prescribed antidepressants<sup>a</sup>**

| Four-digit ICD-9 code | Description                              | Diagnostic code in the past 365 days |       |
|-----------------------|------------------------------------------|--------------------------------------|-------|
|                       |                                          | No. prescriptions                    | %     |
| V999                  | No diagnosis or unspecified              | 25509                                | 34.67 |
| V700                  | General medical examination              | 13476                                | 18.32 |
| 401.9                 | Hypertension, unspecified                | 11309                                | 15.37 |
| 401.1                 | Hypertension, benign                     | 5489                                 | 7.46  |
| 465.9                 | Upper respiratory infection, acute, NOSS | 4651                                 | 6.32  |
| 786.0                 | Dyspnea and respiratory abnormalities    | 4403                                 | 5.98  |
| V723                  | Special investigations and examinations  | 3875                                 | 5.27  |
| 733.0                 | Osteoporosis                             | 3793                                 | 5.16  |
| 309.9                 | Unspecified adjustment reaction          | 3572                                 | 4.85  |
| 414.9                 | Ischemic heart disease                   | 3539                                 | 4.81  |
| 780.7                 | Malaise and fatigue                      | 3470                                 | 4.72  |
| 473.9                 | Sinusitis, chronic, NOS                  | 3304                                 | 4.49  |
| 726.9                 | Unspecified enthesopathy                 | 3223                                 | 4.38  |
| 692.9                 | Contact dermatitis, NOS                  | 2915                                 | 3.96  |
| 300.9                 | Neurosis, NOS                            | 2680                                 | 3.64  |

<sup>a</sup>After excluding diagnostic codes for plausible antidepressant treatment indications and diagnostic codes for conditions in the Charlson comorbidity index

**Table S3 Top 15 billing code categories from medical billings in the past year for MOXXI patients who were prescribed antidepressants**

| Description of medical service <sup>a</sup>      | Category no. | Billing code for the medical service in the past year |       |
|--------------------------------------------------|--------------|-------------------------------------------------------|-------|
|                                                  |              | No. prescriptions                                     | %     |
| Examen complet cabinet - omnipraticien           | 114          | 58 323                                                | 79.27 |
| Forfaits de responsabilité clientèle vulnérables | 170          | 46 726                                                | 63.51 |
| Examen sommaire cabinet - omnipraticien          | 112          | 40 449                                                | 54.98 |
| Traitements psychiatriques - cabinet             | 373          | 34 912                                                | 47.45 |
| Examen complet majeur - cabinet                  | 116          | 24 838                                                | 33.76 |
| Actes diagnostiques                              | 211          | 24 542                                                | 33.36 |
| Consultations – spécialistes - établissement     | 167          | 23 586                                                | 32.06 |
| Examen complet cabinet - spécialiste             | 115          | 19 961                                                | 27.13 |
| Examen complet – établissement malade externe    | 141          | 19 636                                                | 26.69 |
| Radiologie                                       | 350          | 19 092                                                | 25.95 |
| Consultations – spécialistes – cabinet           | 165          | 16 830                                                | 22.87 |
| Examen complet – établissement malade externe    | 135          | 16 625                                                | 22.60 |
| Forfait de prise en charge et de suivi (GMF)     | 183          | 16 318                                                | 22.18 |
| Examen ordinaire – établissement malade externe  | 139          | 15 801                                                | 21.48 |
| Examen ordinaire – établissement malade externe  | 133          | 15 653                                                | 21.27 |

<sup>a</sup>These are the exact (French) definitions of the billing code categories that were provided by RAMQ. The descriptions provided by RAMQ were not unique for each billing code group. The category numbers for each billing code category (column 2) were also provided by RAMQ.

**Table S4. Top 15 in-hospital procedures (CCP codes) performed in the past year for MOXXI patients who were prescribed antidepressants**

| Three-digit<br>CCP code | Description                                                                | CCP code in the past year |      |
|-------------------------|----------------------------------------------------------------------------|---------------------------|------|
|                         |                                                                            | No. prescriptions         | %    |
| 27.7                    | Insertion of prosthetic lens                                               | 1176                      | 1.60 |
| 27.6                    | Other extraction of lens                                                   | 1175                      | 1.60 |
| 13.0                    | Transfusion of blood and blood components                                  | 632                       | 0.86 |
| 13.5                    | Other injection or infusion of other therapeutic or prophylactic substance | 572                       | 0.78 |
| 53.0                    | Bone marrow transplant                                                     | 536                       | 0.73 |
| 48.9                    | Other operations on vessels of heart                                       | 459                       | 0.62 |
| 13.6                    | Respiratory therapy                                                        | 427                       | 0.58 |
| 92.0                    | Arthrotomy for removal of prosthesis                                       | 362                       | 0.49 |
| 17.3                    | Freeing of adhesions and decompression of cranial and peripheral nerves    | 325                       | 0.44 |
| 13.4                    | Injection or infusion of other therapeutic or prophylactic substance       | 309                       | 0.42 |
| 66.6                    | Other repair of abdominal wall and peritoneum                              | 266                       | 0.36 |
| 90.5                    | Internal fixation of bone (without fracture reduction)                     | 263                       | 0.36 |
| 11.6                    | Nonoperative removal of therapeutic device from urinary system             | 258                       | 0.35 |
| 93.4                    | Arthroplasty of knee and ankle                                             | 246                       | 0.33 |
| 63.1                    | Cholecystectomy                                                            | 245                       | 0.33 |

Abbreviations: CCP = Canadian Classification of Diagnostic, Therapeutic, and Surgical Procedures (CCP)

**Table S5 Top 15 drugs prescribed in the past year to MOXXI patients who were prescribed antidepressants**

| Molecule name | Drug prescribed in the past year |       |
|---------------|----------------------------------|-------|
|               | No. prescriptions                | %     |
| Venlafaxine   | 12674                            | 17.23 |
| Citalopram    | 10450                            | 14.20 |
| Levothyroxine | 7415                             | 10.08 |
| Trazodone     | 7175                             | 9.75  |
| Atorvastatin  | 6597                             | 8.97  |
| Lorazepam     | 6595                             | 8.96  |
| Clonazepam    | 6382                             | 8.67  |
| Acetaminophen | 6186                             | 8.41  |
| Bupropion     | 6112                             | 8.31  |
| Pantoprazole  | 5733                             | 7.79  |
| Esomeprazole  | 5249                             | 7.13  |
| Paroxetine    | 5205                             | 7.07  |
| Salbutamol    | 4995                             | 6.79  |
| Amitriptyline | 4910                             | 6.67  |
| Metformin     | 4842                             | 6.58  |

**Table S6 Distribution of the outcome and selected variables among antidepressant prescriptions the training and test sets**

| Variable                                                                                    | No. prescriptions (%) or median (IQR) |                              |                          |
|---------------------------------------------------------------------------------------------|---------------------------------------|------------------------------|--------------------------|
|                                                                                             | Overall<br>(N = 73 576)               | Training set<br>(N = 52 019) | Test set<br>(N = 21 557) |
| <b>Outcome</b>                                                                              |                                       |                              |                          |
| Treatment indication                                                                        |                                       |                              |                          |
| Depression                                                                                  | 41 171 (56.0)                         | 28 887 (55.5)                | 12 284 (57.0)            |
| Anxiety/stress disorders                                                                    | 16 374 (22.3)                         | 11 490 (22.1)                | 4884 (22.7)              |
| Sleeping disorders                                                                          | 7295 (9.9)                            | 5192 (10.0)                  | 2103 (9.8)               |
| Pain                                                                                        | 4137 (5.6)                            | 3046 (5.9)                   | 1091 (5.1)               |
| Other indications                                                                           | 4599 (6.3)                            | 3404 (6.5)                   | 1195 (5.5)               |
| <b>Prescription characteristics</b>                                                         |                                       |                              |                          |
| Top five molecules                                                                          |                                       |                              |                          |
| Venlafaxine                                                                                 | 15 398 (20.9)                         | 11 385 (21.9)                | 4013 (18.6)              |
| Citalopram                                                                                  | 13 623 (18.5)                         | 9146 (17.6)                  | 4477 (20.8)              |
| Trazodone                                                                                   | 6891 (9.4)                            | 5152 (9.9)                   | 1739 (8.1)               |
| Paroxetine                                                                                  | 6751 (9.2)                            | 4923 (9.5)                   | 1828 (8.5)               |
| Amitriptyline                                                                               | 6196 (8.4)                            | 4336 (8.3)                   | 1860 (8.6)               |
| Drug prescribed on a 'take-as-needed' basis                                                 | 2117 (2.9)                            | 1951 (3.8)                   | 166 (0.8)                |
| <b>Patient characteristics</b>                                                              |                                       |                              |                          |
| Female                                                                                      | 50 689 (68.9)                         | 35 134 (67.5)                | 15 555 (72.2)            |
| Age                                                                                         | 55 (45 – 65)                          | 54 (45 – 64)                 | 55 (45 – 65)             |
| Type of drug insurance                                                                      |                                       |                              |                          |
| Public plan                                                                                 | 40 912 (55.6)                         | 29 171 (56.1)                | 11 741 (54.5)            |
| Private plan                                                                                | 32 664 (44.4)                         | 22 848 (43.9)                | 9816 (45.5)              |
| No diagnostic code for a plausible antidepressant treatment indication                      |                                       |                              |                          |
| ±3 days around the index prescription date                                                  | 42 248 (57.4)                         | 29 394 (56.5)                | 12 864 (59.7)            |
| +3 to -365 days around the index prescription date                                          | 16 538 (22.5)                         | 12 081 (23.2)                | 4457 (20.7)              |
| Chronic condition in the Charlson comorbidity index                                         | 23 297 (31.7)                         | 16 145 (31.0)                | 7152 (33.2)              |
| Previous hospitalization in the past 365 days                                               | 6769 (9.2)                            | 4701 (9.0)                   | 2068 (9.6)               |
| Previous ER visit in the past 365 days                                                      | 23 923 (32.5)                         | 17 280 (33.2)                | 6643 (30.8)              |
| <b>Physician characteristics</b>                                                            |                                       |                              |                          |
| Place of medical training                                                                   |                                       |                              |                          |
| Canada/US                                                                                   | 66 223 (90.0)                         | 48 868 (93.9)                | 17 355 (80.5)            |
| Other country                                                                               | 7353 (10.0)                           | 3151 (6.1)                   | 4202 (19.5)              |
| Years in practice                                                                           |                                       |                              |                          |
| 15+ years                                                                                   | 69 168 (94.0)                         | 49 082 (94.4)                | 20 086 (93.2)            |
| <15 years                                                                                   | 4408 (6.0)                            | 2937 (5.7)                   | 1471 (6.8)               |
| Average number of patients per working day                                                  | 18 (13 – 23)                          | 18 (12 – 23)                 | 19 (16 – 22)             |
| Factors affecting physician response to new information on evidence-based clinical practice |                                       |                              |                          |
| Evidence score                                                                              | 20 (19 – 22)                          | 21 (19 – 22)                 | 20 (19 – 21)             |
| Nonconformity score                                                                         | 17 (15 – 19)                          | 16 (15 – 18)                 | 19 (15 – 20)             |
| Practicality score                                                                          | 15 (14 – 17)                          | 15 (14 – 18)                 | 15 (14 – 15)             |

**Table S7 Coefficients for the final prediction model used to estimate the probability of indications besides depression among prescriptions in the test set**

| <b>Variable</b>                                          | <b>Regression coefficient</b> | <b>Standard deviation<sup>a</sup></b> |
|----------------------------------------------------------|-------------------------------|---------------------------------------|
| Intercept                                                | -2.14                         | 0.617                                 |
| <b>Prescription-related factors</b>                      |                               |                                       |
| Molecule name                                            |                               |                                       |
| Venlafaxine                                              | 0.00 [Reference]              | -                                     |
| Amitriptyline                                            | 2.997                         | 0.440                                 |
| Trazodone                                                | 2.693                         | 0.491                                 |
| Nortriptyline                                            | 2.714                         | 2.442                                 |
| Doxepin                                                  | 1.801                         | 1.430                                 |
| Imipramine                                               | 1.676                         | 4.257                                 |
| Desipramine                                              | 1.995                         | 4.415                                 |
| Duloxetine                                               | 0.939                         | 0.531                                 |
| Paroxetine                                               | 0.553                         | 0.372                                 |
| Clomipramine                                             | -0.515                        | 1.407                                 |
| Citalopram                                               | -0.047                        | 0.269                                 |
| Escitalopram                                             | -0.339                        | 0.319                                 |
| Sertraline                                               | -0.612                        | 0.318                                 |
| Fluvoxamine                                              | -0.421                        | 0.686                                 |
| Trimipramine                                             | -0.299                        | 1.791                                 |
| Fluoxetine                                               | -0.713                        | 0.518                                 |
| Mirtazapine                                              | -1.068                        | 0.506                                 |
| Bupropion                                                | -1.989                        | 0.470                                 |
| Desvenlafaxine                                           | -1.858                        | 5.150                                 |
| Prescribed dose (mg/day), per 10 mg increase by molecule |                               |                                       |
| Mirtazapine                                              | -0.342                        | 0.176                                 |
| Nortriptyline                                            | -0.331                        | 0.581                                 |
| Paroxetine                                               | -0.220                        | 0.100                                 |
| Desvenlafaxine                                           | -0.125                        | 1.012                                 |
| Doxepin                                                  | -0.084                        | 0.176                                 |
| Citalopram                                               | -0.172                        | 0.072                                 |
| Imipramine                                               | -0.109                        | 0.431                                 |
| Fluoxetine                                               | -0.050                        | 0.169                                 |
| Desipramine                                              | -0.236                        | 0.504                                 |
| Amitriptyline                                            | -0.041                        | 0.093                                 |
| Escitalopram                                             | -0.044                        | 0.192                                 |
| Duloxetine                                               | -0.085                        | 0.090                                 |
| Venlafaxine                                              | -0.049                        | 0.013                                 |
| Trimipramine                                             | -0.104                        | 0.680                                 |
| Sertraline                                               | -0.009                        | 0.025                                 |
| Trazodone                                                | -0.004                        | 0.030                                 |
| Fluvoxamine                                              | -0.012                        | 0.047                                 |
| Clomipramine                                             | 0.098                         | 0.152                                 |
| Bupropion                                                | 0.029                         | 0.018                                 |
| Drug prescribed on a 'take-as-needed' basis              | 1.188                         | 0.452                                 |

<sup>a</sup>Across 1000 bootstrap re-samples of the training set, where prescriptions were resampled using a two-stage cluster bootstrap to account for non-independence of prescriptions from the same physician and for the same patient.

**APPENDIX D. (continued) Coefficients for the final prediction model used to estimate the probability of indications besides depression among prescriptions in the test set**

| Variable                                                                            | Regression coefficient |                 | Standard deviation <sup>a</sup> |                 |
|-------------------------------------------------------------------------------------|------------------------|-----------------|---------------------------------|-----------------|
| <b>Patient-related factors</b>                                                      |                        |                 |                                 |                 |
| Age (years <sup>-2</sup> )                                                          | 234.900                |                 | 90.596                          |                 |
| Any diagnostic procedure in the past year                                           | 0.176                  |                 | 0.076                           |                 |
| Less than university education (%), per 1% increase                                 | 0.067                  |                 | 0.021                           |                 |
| Number of outpatient visits in the past year (visits <sup>-0.5</sup> ) <sup>b</sup> | 0.546                  |                 | 0.229                           |                 |
| Diagnostic codes in the past year                                                   |                        |                 |                                 |                 |
| Unspecified nonpsychotic mental disorder following organic brain damage (310.9)     | -0.828                 |                 | 0.412                           |                 |
| Dementia                                                                            | -0.484                 |                 | 0.269                           |                 |
| Diabetes without chronic complication                                               | -0.336                 |                 | 0.122                           |                 |
| <u>Plausible antidepressant treatment indications</u>                               |                        |                 |                                 |                 |
|                                                                                     | ± 3 days               | -4 to -365 days | ± 3 days                        | -4 to -365 days |
| Depression                                                                          | -1.087                 | -0.876          | 0.130                           | 0.106           |
| Anxiety/stress disorders                                                            | 0.655                  | 0.453           | 0.161                           | 0.115           |
| Sleeping disorders                                                                  | 0.568                  | -0.007          | 0.244                           | 0.143           |
| Pain                                                                                | 0.197                  | 0.011           | 0.123                           | 0.060           |
| Migraine                                                                            | 0.163                  | -0.006          | 0.278                           | 0.120           |
| Fibromyalgia                                                                        | 0.836                  | 0.176           | 0.281                           | 0.155           |
| Obsessive-compulsive disorder                                                       | 2.559                  | 1.260           | 2.022                           | 0.475           |
| Vasomotor symptoms of menopause                                                     | 0.201                  | -0.008          | 0.288                           | 0.135           |
| Nicotine dependence                                                                 | 0.878                  | -0.097          | 0.699                           | 0.318           |
| Attention deficit/hyperactivity disorder                                            | 0.791                  | 0.299           | 0.525                           | 0.340           |
| Sexual dysfunction                                                                  | -2.939                 | 0.342           | 5.930                           | 1.020           |
| Pre-menstrual dysphoric disorder                                                    | 0.703                  | -0.135          | 3.936                           | 1.027           |
| Eating disorders                                                                    | 1.141                  | 0.869           | 3.453                           | 0.664           |
| Drugs prescribed in the past year                                                   |                        |                 |                                 |                 |
| Furosemide                                                                          | -0.670                 |                 | 0.344                           |                 |
| Trazodone                                                                           | -0.349                 |                 | 0.165                           |                 |
| Quetiapine                                                                          | -0.332                 |                 | 0.175                           |                 |
| <b>Physician-related factors</b>                                                    |                        |                 |                                 |                 |
| Average number of patients per working day (patients <sup>-0.5</sup> )              | 2.022                  |                 | 0.904                           |                 |

<sup>a</sup>Across 1000 bootstrap re-samples of the training set, where prescriptions were resampled using a two-stage cluster bootstrap to account for non-independence of prescriptions from the same physician and for the same patient.

<sup>b</sup>Because the domain of this variable included 0, the original values were shifted up by 1 before applying the power
